# The effect of presentation level on spectrotemporal modulation detection

Sara Magits<sup>a,1</sup>, Arturo Moncada-Torres<sup>a,1</sup>, Lieselot Van Deun<sup>a,b</sup>,  
Jan Wouters<sup>a</sup>, Astrid van Wieringen<sup>a</sup>, Tom Francart<sup>a,\*</sup>

<sup>a</sup>*KU Leuven - University of Leuven, Dept. of Neurosciences, ExpORL, Herestraat 49,  
Bus 721, 3000 Leuven, Belgium*

<sup>b</sup>*Department of Otorhinolaryngology, Head and Neck Surgery, University Hospitals  
Leuven, Leuven, Belgium*

---

## Abstract

The understanding of speech in noise relies (at least partially) on spectrotemporal modulation sensitivity. This sensitivity can be measured by spectral ripple tests, which can be administered at different presentation levels. However, it is not known how presentation level affects spectrotemporal modulation thresholds. In this work, we present behavioral data for normal-hearing adults which show that at higher ripple densities (2 and 4 ripples/oct), increasing presentation level led to worse discrimination thresholds. Results of a computational model suggested that the higher thresholds could be explained by a worsening of the spectrotemporal representation in the auditory nerve due to broadening of cochlear filters and neural activity saturation. Our results demonstrate the importance of taking presentation level into account when administering spectrotemporal modulation detection tests.

---

\*Corresponding author.

*Email address:* [tom.francart@kuleuven.be](mailto:tom.francart@kuleuven.be) (Tom Francart)

<sup>1</sup>These authors declare equal contributions to this study and should be considered joint first authors.

*Keywords:* computational model, normal hearing, spectral ripple test, spectrotemporal sensitivity

---

## 1 **1. Introduction**

2       Complex acoustic signals such as speech are characterized by a combina-  
3       tion of spectral and temporal modulations. Speech understanding relies (at  
4       least partially) on the ability to detect and discriminate these modulations.  
5       In other words, it relies on an individual’s spectrotemporal modulation sen-  
6       sitivity (Supin et al., 1997). This can be assessed by two categories of tests:  
7       *spectral ripple discrimination* tests and *spectral/spectrotemporal modulation*  
8       *detection* (SMD/STMD, respectively) tests. There are many varieties of  
9       these. However, in this paper we focus on an SMD/STMD test where par-  
10       ticipants are asked to discriminate between a modulated and unmodulated  
11       stimulus. The modulation detection threshold is usually defined as the min-  
12       imal peak-to-valley ratio or modulation index at which the participant can  
13       discriminate between the two stimuli (e.g., Bernstein et al., 2013).

14       It has been shown that SMD/STMD thresholds are correlated with dif-  
15       ferent measures of speech perception in quiet and in noise (Anderson et al.,  
16       2012; Mehraei et al., 2014; Davies-Venn et al., 2015; Croghan and Smith,  
17       2018). Additionally, SMD/STMD thresholds can provide a non-linguistic  
18       measure of spectral/spectrotemporal sensitivity without the confounding fac-  
19       tor of language knowledge that plays a role in standardized tests (e.g., speech  
20       audiometry, Gifford et al., 2014; Davies-Venn et al., 2015; Choi et al., 2016).  
21       This has motivated their use for a variety of purposes. For example, STMD  
22       paradigms have been used to explore perceptual learning mechanisms in the  
23       auditory system (Sabin et al., 2012). SMD/STMD tests have also used spec-  
24       tral/spectrotemporal resolution successfully as an outcome measure in dif-  
25       ferent fields of audiological research: prediction of speech understanding in

26 noise of hearing-aid users (Bernstein et al., 2016), assessment of cochlear  
27 implant candidacy, parameter fitting, and new sound processing strategies  
28 (Langner et al., 2017; Choi et al., 2016; Croghan and Smith, 2018; Zheng  
29 et al., 2017), evaluation of bimodal hearing benefit (Zhang et al., 2013), and  
30 music perception (Choi et al., 2018).

31 Although these tests are used mostly in audiological research, to our  
32 knowledge no studies have evaluated how presentation level affects SMD/STMD  
33 thresholds. This is relevant because SMD/STMD thresholds might be nega-  
34 tively affected by the broadening of the auditory filters with increasing pre-  
35 sentation level (Glasberg and Moore, 2000). Taking the effect of level into  
36 account is crucial when administering SMD/STMD tests in a research en-  
37 vironment, in (potential) clinical practice, and even more in test situations  
38 where it cannot be controlled strictly (e.g., home-based computerized reha-  
39 bilitation programs). Furthermore, we need to understand this effect to be  
40 able to make a fair comparison of behavioral SMD/STMD results obtained  
41 at different presentation levels within and across studies.

42 The goal of this work was to explore how presentation level affects SMD/STMD  
43 thresholds for young adult NH participants. Specifically, we focused on the  
44 STMD test, since spectrotemporally modulated (i.e., moving spectral ripple)  
45 stimuli have been suggested to provide a better representation of speech (Won  
46 et al., 2015) than stimuli measuring sensitivity to only spectral (i.e., rippled,  
47 Litvak et al., 2007; Saoji et al., 2009) or temporal modulation. Addition-  
48 ally, STMD tests prevent participants from having access to phase cues by  
49 using low rate temporal modulation (Bernstein et al., 2013). Furthermore,  
50 we used a biologically inspired model of peripheral processing up to the au-

51 ditory nerve (AN) to help us interpret the behavioral results, to study the  
52 contribution of peripheral information to spectrotemporal sensitivity, and to  
53 generate STMD threshold predictions.

## 54 **2. Behavioral Measurements**

### 55 *2.1. Materials & Methods*

#### 56 *2.1.1. Participants*

57 Ten participants (1 male, 9 female, median age 23.5 years, age range  
58 21–29 years) took part. They had audiometric thresholds  $\leq 20$  dB HL at  
59 all octave frequencies from 125 to 8000 Hz. Written informed consent was  
60 obtained. The study was approved by the Ethics Committee of the University  
61 Hospitals Leuven (approval no. B322201731501).

#### 62 *2.1.2. Equipment*

63 Measurements were performed in a double-walled sound-attenuating booth.  
64 Stimuli were played from a computer via an RME Hammerfall DSP Multi-  
65 face II sound card and presented to the participants through Sennheiser HDA  
66 200 headphones using APEX 3 (Francart et al., 2008).

#### 67 *2.1.3. Stimuli*

68 We used the spectrotemporally modulated stimuli described by Kowalski  
69 et al. (1996) and Chi et al. (1999). These were 500-ms long (including 20-ms  
70 onset and offset cosine ramps) and were generated with a sampling frequency  
71 of 44100 Hz and 16-bit resolution using MATLAB (Mathworks, Natick, MA).

72 The spectral modulation was achieved as follows. The spectrum of the  
73 ripple stimulus (the “carrier”) consisted of 4000 random-phase tones equally

74 spaced along the (logarithmic) frequency axis from 354 to 5656 Hz. The  
75 amplitudes of the individual components were adjusted to form a sinusoidally  
76 shaped spectrum around a flat base. The amplitude of the ripple was defined  
77 as the modulation depth  $m$ . The initial phase of the ripple  $\Phi$  was defined  
78 relative to a sine wave starting at the low-frequency edge. Its value was set  
79 using 50 different selections of random phases between 0 and  $2\pi$  to prevent  
80 participants from using phase differences as a cue. The ripple density was  
81 defined as  $\Omega$  (with values of 0.5, 2, and 4 ripples/oct). The mathematical  
82 expression for the static ripple is given in Eq. 1

$$S(x) = 1 + m \sin(2\pi \Omega x + \Phi) \quad (1)$$

83 where  $x$  is the position on the logarithmic frequency axis (in octaves), which  
84 was defined as  $x = \log_2(\frac{f}{f_0})$  with  $f$  being the component tone frequency and  
85  $f_0$  the low-frequency edge. Notice that when  $m = 0$ , the resulting profile is  
86 a flat spectrum.

87 The temporal modulation was achieved by moving the static ripple down-  
88 wards along the frequency axis at a constant velocity  $\omega$  (defined as the num-  
89 ber of ripple per second passing the low-frequency edge of the spectrum).  
90 The value of  $\omega$  was 4 Hz. The complete mathematical expression for the  
91 spectrotemporal modulated stimuli is given in Eq. 2, where  $t$  is time.

$$S(x, t) = 1 + m \sin(2\pi (\omega t + \Omega x) + \Phi) \quad (2)$$

92 In order to make our results comparable to those of previous studies, we  
93 report the modulation depth  $m$  as  $20 \log_{10}(m)$  (i.e., in dB). The *reference*  
94 *stimulus* was unmodulated (i.e.,  $20 \log_{10}(m) = -\infty$  dB), whereas the modu-

95 lation depth of the *target stimulus* was varied adaptively (Sec. 2.1.4). Figure 1  
96 shows spectrograms of the reference stimulus and two example target stimuli  
97 ( $20 \log_{10}(m) = -6 \text{ dB}$  and  $20 \log_{10}(m) = 0 \text{ dB}$ ).

#### 98 2.1.4. Procedure

99 Initially, the stimuli were presented at levels of 65 and 86 dB SPL using all  
100 three ripple densities (0.5, 2, and 4 ripples/oct). Then, stimuli were presented  
101 at levels of 55, 65, 75, and 86 dB SPL with a ripple density of 4 ripples/oct.

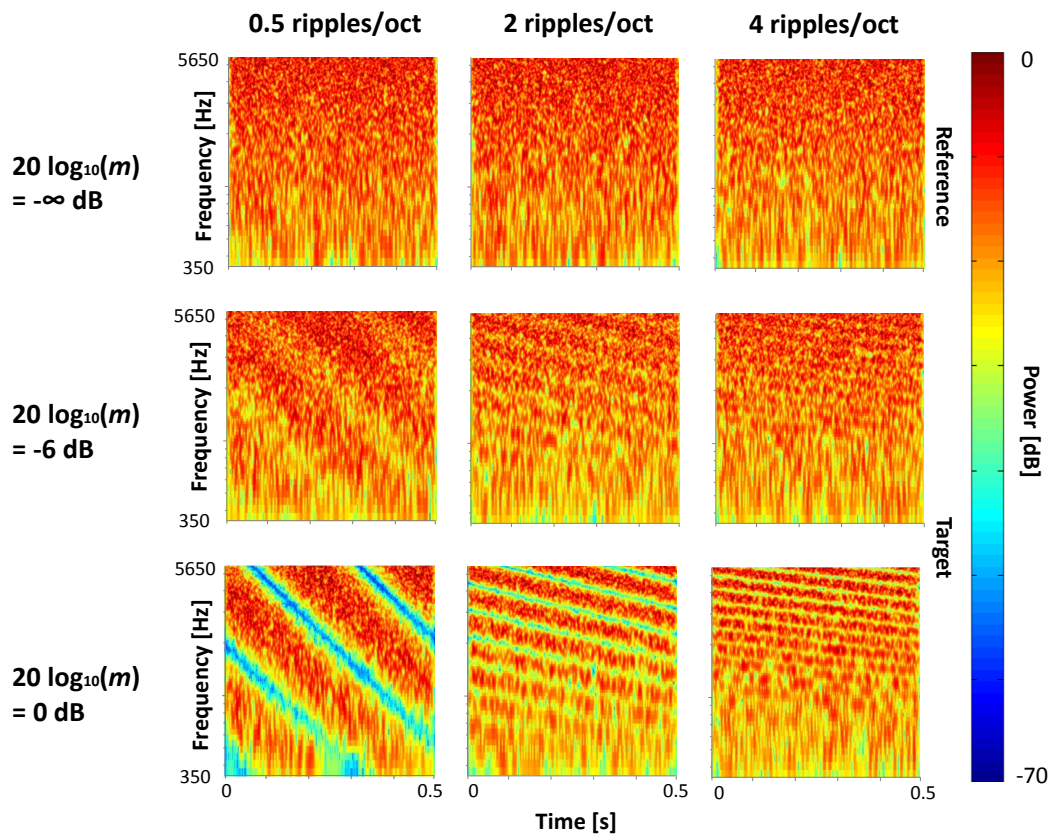

Figure 1: (Color online) Spectrograms of the spectrotemporally modulated stimuli. Notice how the pattern along the frequency axis changes with increasing ripple density.

102 Throughout, stimuli were presented monaurally to the left ear. Level roving  
103 of 8 dB was used (i.e., random gain between -4 and 4 dB for each stimulus)  
104 to reduce the salience of level cues (Eddins and Bero, 2007).

105 A two-interval two-alternative forced-choice task was used. One of the  
106 intervals contained the unmodulated (i.e., reference) stimulus and the other  
107 interval contained the modulated (i.e., target) stimulus. The target was ran-  
108 domly presented in the first or second interval with equal probability. There  
109 was a 500-ms pause between intervals. Participants were seated in front of  
110 a computer screen. They were instructed to discriminate the target interval,  
111 which would correspond to the stimulus with a “rippled, vibrating sound”,  
112 from the reference interval, which would correspond to the stimulus with a  
113 “noisy sound”. They did so by clicking on the corresponding button on the  
114 screen (or by using the corresponding keys on the keyboard). Visual feedback  
115 was provided through a green (correct response) or red (incorrect response)  
116 highlight after each trial. Conditions were presented to each participant in a  
117 random order. In a given run, the ripple density was fixed. The modulation  
118 depth at threshold was estimated using a three-down one-up procedure track-  
119 ing the 79.4% point on the psychometric function (Levitt, 1971). Each run  
120 started with a fully modulated target ( $20 \log_{10}(m) = 0$  dB). The modulation  
121 depth was decreased by 6 dB after the first reversal, changed by 4 dB until  
122 two more reversals occurred, and changed by 2 dB for the last 6 reversals. A  
123 run was ended after 9 reversals. For each run, the mean value of  $20 \log_{10} m$  at  
124 the last 6 reversals was calculated. Participants completed a test and retest  
125 run for every condition. If the thresholds for the two differed by more than  
126 3 dB, a third run was completed. For each condition, the final threshold was



127 taken as the average of all runs.

## 128 2.2. Results

129 Statistical analysis was conducted using the R programming language  
130 and statistical environment (R Core Team, 2017).

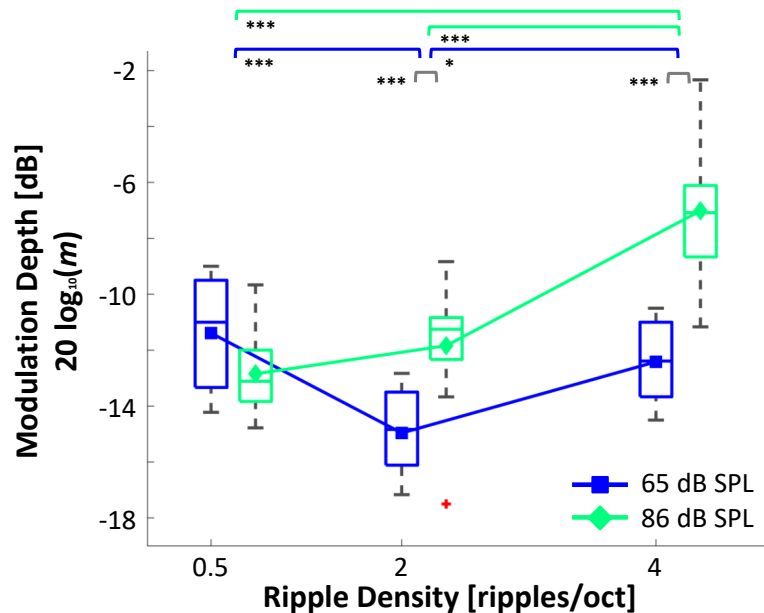

Figure 2: (Color online) STMD thresholds boxplot. The line in the middle of each box represents the median of the participants' thresholds for each condition. Symbols represent the average. The vertical edges of each box represent the 25th and 75th percentiles. The distance between them is the interquartile range (IQR). Error bars (i.e., whiskers) are drawn from the ends of the IQR to the furthest data point within 1.5 of the IQR. Crosses represent data points beyond that (i.e., outliers). Lower thresholds indicate better performance. \* =  $p < 0.05$ , \*\*\* =  $p < 0.001$ .

131 Figure 2 shows a boxplot of the STMD thresholds together with the aver-  
132 age across participants for stimuli at 65 and 86 dB SPL and 0.5, 2 and 4 rip-  
133 ples/oct. A general linear model (GLM) showed that ripple density had a

134 significant effect on the STMD thresholds ( $\chi^2(1) = 8.26, p < 0.001$ ) as  
135 did level ( $\chi^2(1) = 11.76, p < 0.001$ ). There was a significant interaction  
136 of ripple density and level ( $\chi^2(1) = 24.17, p < 0.001$ ). Tukey *post hoc*  
137 tests on the GLM revealed increased thresholds with increasing ripple den-  
138 sity at 86 dB SPL, between 0.5 ripples/oct and 4 ripples/oct ( $z = 5.83,$   
139  $p < 0.001$ , confidence interval (CI) [3.64, 8.02]) and between 2 ripples/oct  
140 and 4 ripples/oct ( $z = 4.82, p < 0.001$ , CI [2.63, 7.01]). In contrast,  
141 thresholds decreased with increasing ripple density at 65 dB SPL between  
142 0.5 ripples/oct and 2 ripples/oct ( $z = -3.57, p < 0.001$ , CI [-5.76, -1.38])  
143 and then increased between 2 ripples/oct and 4 ripples/oct ( $z = 2.54,$   
144  $p = 0.012$ , CI [0.35, 4.73]). The STMD thresholds were significantly lower  
145 at 65 dB SPL than at 86 dB SPL at 2 ripples/oct ( $z = 3.12, p < 0.001$ ,  
146 CI [0.93, 5.31]) and at 4 ripples/oct ( $z = 5.40, p < 0.001$ , CI [3.21, 7.59]),  
147 but not at 0.5 ripples/oct ( $z = -1.45, p = 0.40$ , CI [-3.64, 0.73]).

148 Figure 3 shows a boxplot of the STMD thresholds for stimuli at 55, 65, 75, and  
149 86 dB SPL and 4 ripples/oct. STMD thresholds changed significantly with  
150 level (Friedman's ANOVA,  $\chi^2_F(3) = 24.36, p < 0.001$ ). There was a large  
151 increase between 65 and 75 dB SPL. *Post hoc* Conover's tests with Holm  
152 correction for multiple comparisons revealed significant differences between  
153 55 and 75 dB SPL ( $p < 0.001$ ), 55 and 86 dB SPL ( $p < 0.001$ ), 65 and  
154 75 dB SPL ( $p < 0.001$ ), 65 and 86 dB SPL ( $p < 0.001$ ), and 75 dB SPL and  
155 86 dB SPL ( $p < 0.001$ ). There was no significant difference between thresh-  
156 olds for the two lowest levels (55 and 65 dB SPL,  $p > 0.05$ ).

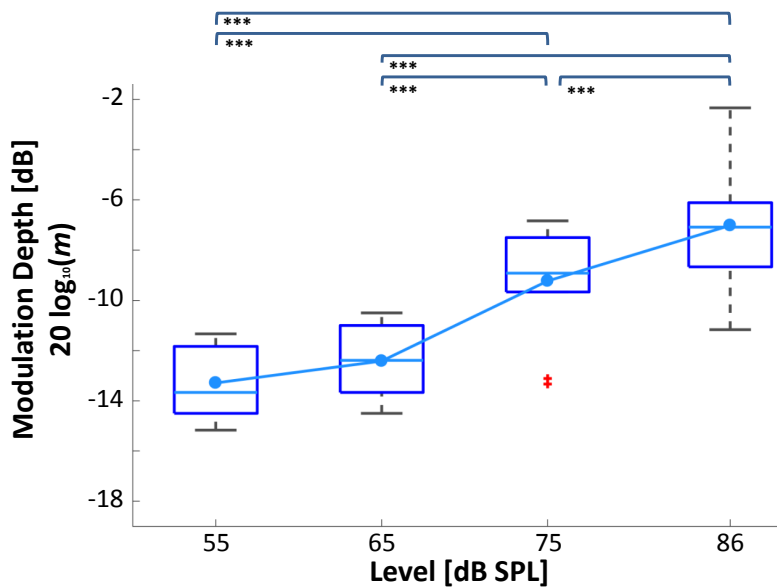

Figure 3: (Color online) STMD thresholds boxplot with a ripple density of 4 ripples/oct. Otherwise as Figure 2.

### 157 3. Computational Model

158 We used a computational model with a physiologically inspired front end  
159 (i.e., model of the auditory periphery up to the AN) to help us interpret  
160 the behavioral results, to study the contribution of peripheral information  
161 to spectrotemporal sensitivity, and to obtain quantitative predictions of the  
162 behavioral thresholds. A block diagram of the model is shown in Fig. 4. We  
163 hypothesized that the model would reflect a worsening in the spectrotemporal  
164 representation in the AN with increasing level.

#### 165 3.1. Stimuli

166 We included a wider range of levels (from 40 to 95 dB SPL in steps of  
167 5 dB) than used in the experiments. We used the same ripple densities

168 (0.5, 2, and 4 ripples/oct). We simulated responses to the reference stimulus  
 169 ( $20 \log_{10}(m) = -\infty$  dB) and target stimuli with a modulation depth of  
 170  $20 \log_{10}(m) = -6$  dB and  $20 \log_{10}(m) = 0$  dB (which correspond to 50 and  
 171 100% modulation, respectively, in a linear scale).

### 172 3.2. AN Model

173 The model proposed by Zilany et al. (2009, 2014) was used as a front  
 174 end. This model reproduces the responses of AN fibers to acoustic stimu-  
 175 lation. It has been validated with a wide range of physiological data. It

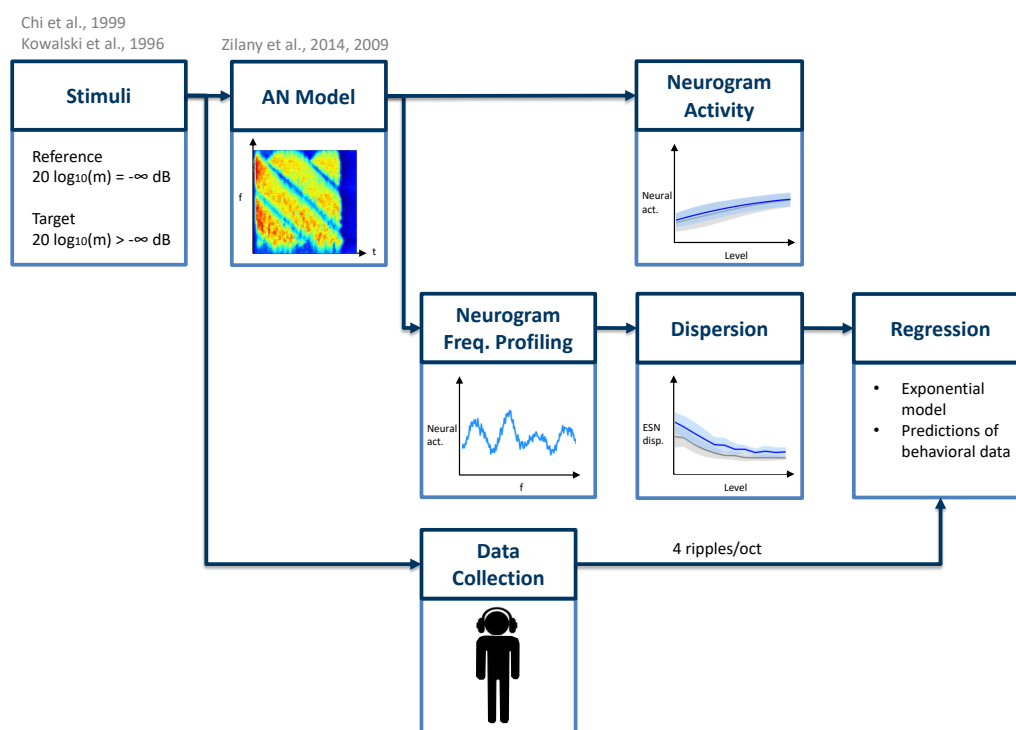

Figure 4: (Color online) Block diagram of the computational model used to interpret the behavioral data and to study the contribution of peripheral information to spectrotemporal sensitivity.

176 is comprised of different modules (each simulating a specific function of the  
177 auditory periphery).

178 First, the stimulus is passed through a filter simulating the middle ear  
179 frequency response. The output is fed to a signal path and a control path.  
180 The signal path mimics the behavior of the outer-hair-cell- (OHC-) controlled  
181 filtering of the basilar membrane in the cochlea and the transduction of the  
182 inner-hair-cells (IHCs) by a series of non-linear and low-pass filters. The con-  
183 trol path mimics the function of the OHCs in controlling basilar membrane  
184 filtering. The control path output feeds back into itself and into the signal  
185 path. The output of the IHCs is fed to the IHC-AN synapse module with  
186 two power-law adaptation paths, which simulate slow and fast adaptation.

187 For each stimulus, the AN model generated a so-called early stage neu-  
188 rogram (ESN). An ESN is a time-frequency representation of a signal which  
189 encodes temporal modulations caused by the interaction of spectral compo-  
190 nents in each band ([Elhilali et al., 2003](#)). It shows the response of neurons  
191 tuned to different characteristic frequencies (CFs) through time. We used  
192 512 CFs logarithmically spaced from 250 to 8000 Hz. For each CF, we simu-  
193 lated the average response of 50 AN fibers with different spontaneous rates:  
194 high (100 spikes/s), medium (5 spikes/s), and low (0.1 spikes/s), with propor-  
195 tions of 0.6, 0.2, and 0.2, respectively, which correspond to the distribution  
196 observed in mammals ([Liberman, 1978](#); [Zilany and Bruce, 2007](#)). We grouped  
197 the neural activity into time bins of 8 ms, which is close to the equivalent  
198 rectangular duration of the temporal window of the auditory system ([Moore  
199 et al., 1988](#); [Oxenham and Moore, 1994](#)). Afterwards, we smoothed the re-  
200 sponse by convolving it with a 2-sample long rectangular window with 50%

201 overlap. Figure 5 shows example ESNs of reference and target stimuli for  
202 different ripple densities.

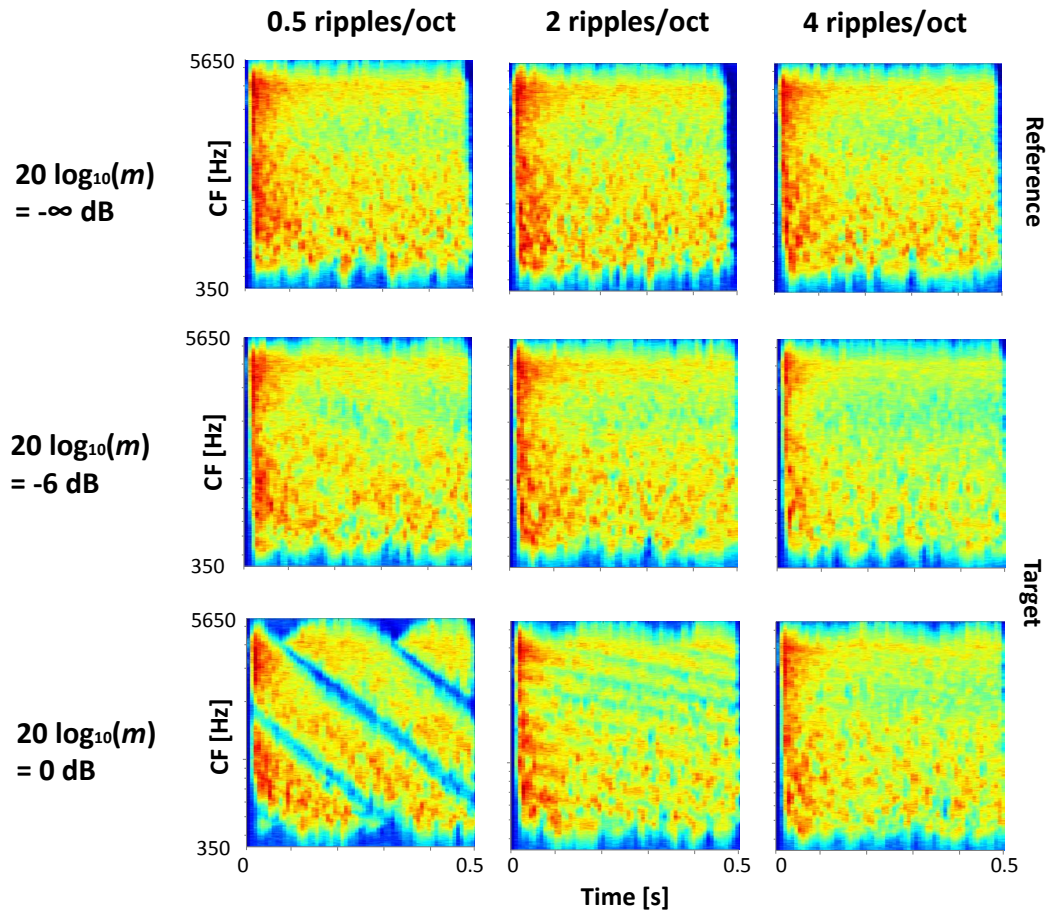

Figure 5: (Color online) ESNs of spectrotemporally modulated stimuli.

### 203 3.3. Neurogram activity

204 We quantified the increase of neural activity by computing the mean and  
205 standard deviation of the neurograms across different levels. Figure 6 shows  
206 plots of the ESN activity for the reference stimulus ( $20 \log_{10}(m) = -\infty$  dB)  
207 and a fully-modulated target stimulus ( $20 \log_{10}(m) = 0$  dB). In all cases,

208 increasing the level increased the neural activity and the slope of the curves  
209 decreased at high levels. These trends were consistent across all three ripple  
210 densities.

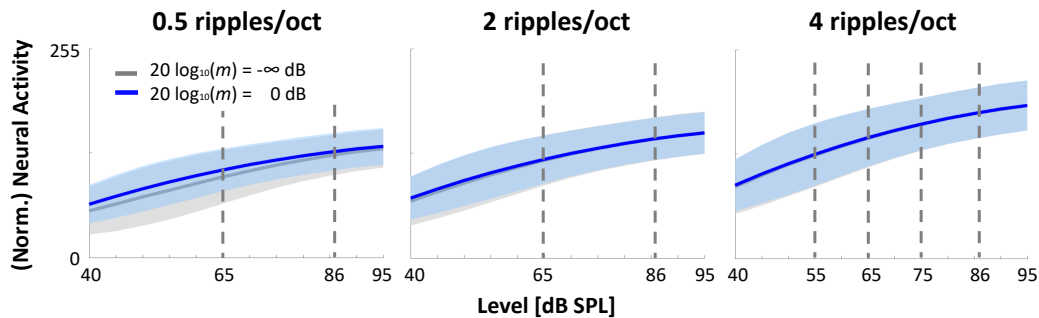

Figure 6: (Color online) Neurogram activity. The solid lines and the shaded areas correspond to the mean and standard deviation, respectively, of each neurogram. This is a measure of the amount of activity at the AN level. A large increase in activity could lead to saturation and, therefore, to a poorer spectrotemporal representation, yielding higher thresholds (Sec. 4). The dashed lines represent the levels at which behavioral measurements were obtained.

### 211 3.4. Neurogram frequency profiling

212 We defined a *frequency profile* of a neurogram as a slice across its CFs at  
213 a given point in time. If we think of a neurogram as an image, a frequency  
214 profile would correspond to all the row values of a specific column.

215 Consider the ESNs in Fig. 5 for the ripple density of 0.5 ripples/oct.  
216 The top ESN ( $20 \log_{10}(m) = -\infty$  dB) shows a uniform, indistinct pattern.  
217 A frequency profile at any point in time would show a roughly flat curve.  
218 In contrast, the bottom ESN ( $20 \log_{10}(m) = 0$  dB) shows a clear pattern,  
219 reflecting the spectrotemporal characteristics of the stimulus. A frequency

220 profile at any point in time would show distinct crests and troughs. Figure 7  
221 shows frequency profiles for different ripple densities at different levels.

### 222 3.5. Dispersion

223 One measure of the information available at the AN level for detection  
224 of modulation is the dispersion of the frequency profiles (i.e., columns) of  
225 the ESNs across time. The dispersion is a measure of the amplitude of  
226 the frequency profile curves. It measures the amount of variation in am-  
227 plitude across the frequency range. We quantified this dispersion using the  
228 interquartile range (IQR), as shown in Eq. 3. We also computed a measure  
229 of the dispersion variability across all the frequency profiles of a given neu-  
230 rogram, as shown in Eq. 4. In both cases,  $ESN_j$  is the frequency profile at  
231 the  $j$ -th point in time.

$$ESN_{disp} = \text{Median}(\text{IQR}(ESN_j)) \quad (3)$$

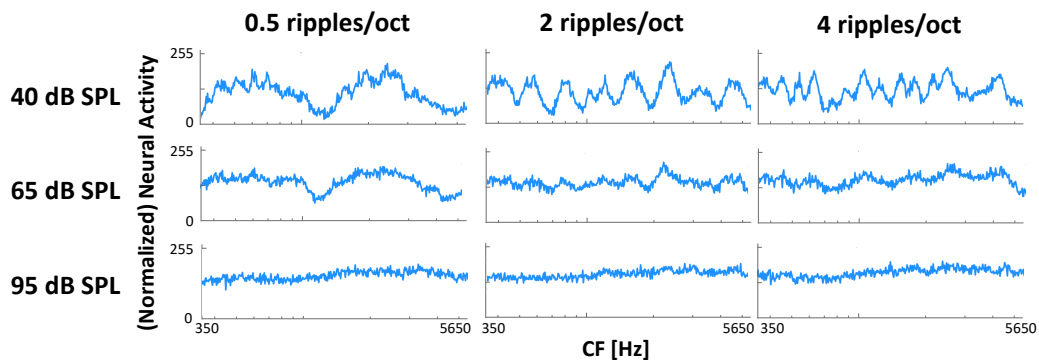

Figure 7: (Color online) Frequency profiles of the ESNs at  $t = 250$  ms (total duration of the stimulus was 500 ms).



$$\text{ESN}_{\text{dispVar}} = \text{IQR}(\text{IQR}(\text{ESN}_j)) \quad (4)$$

232 Figure 8 shows plots of ESN dispersion. Deeper modulations (closer  
233 to  $20 \log_{10}(m) = 0$  dB) led to larger dispersions for lower ripple densities  
234 (0.5 and 2 ripples/oct). In all cases, increasing the level reduced the disper-  
235 sion. This trend was consistent across all three ripple densities.

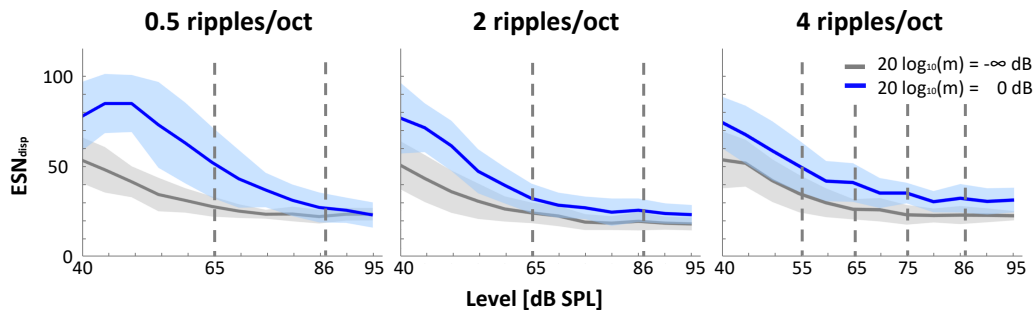

Figure 8: (Color online) Plots of ESN dispersion. The solid lines and the shaded areas correspond to the ESN dispersion and dispersion variability, respectively, for frequency profiles across all time points for each neurogram. The ESN dispersion is a measure of the amount of information for modulation detection available at the AN level (larger dispersion allows for higher detectability, Sec. 4). The dashed lines represent the levels at which behavioral measurements were obtained.

### 236 3.6. Regression

237 Model results were compared with the behavioral data using a regression  
238 model. Since the results of experiment 1 showed that the effect of presenta-  
239 tion level was largest at 4 ripples/oct, we focused on the behavioral data for  
240 experiment 2.

241 We calculated the difference in dispersion between a fully-modulated tar-  
242 get stimulus ( $20 \log_{10}(m) = 0$  dB) and the non-modulated reference as a  
243 predictor for an exponential regression model as described by Eq. 5:

$$\text{Behav. thresh.}(\text{ESN}_{\text{disp}}, \text{ESN}_{\text{disp ref}}) = a e^{b(\text{ESN}_{\text{disp}} - \text{ESN}_{\text{disp ref}})} \quad (5)$$

244 with parameters  $a$  and  $b$ . It yielded an (adjusted)  $R^2$  value of 0.98 and a  
245 root mean squared error (RMSE) of 0.25 dB. Figure 9 shows plots of the  
246 behavioral data versus the model metric as well as the regression model.  
247 We used the generated model to predict the behavioral thresholds for the  
248 different levels. Figure 10 shows the model's predictions as well as the mean  
249 of the behavioral data (as a reference). The model predictions show that the  
250 lowest (best) STMD threshold is around  $20 \log_{10}(m) = -13.5$  dB for the  
251 modelled experiment.

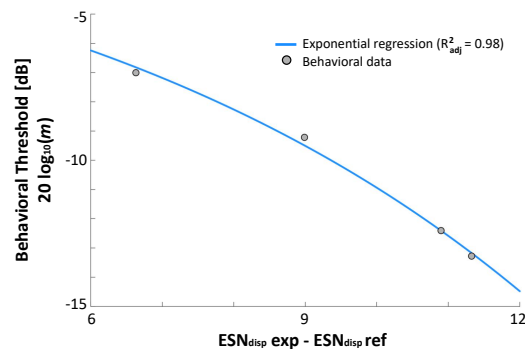

Figure 9: (Color online) Exponential regression model of the behavioral thresholds of experiment 2 (ripple density of 4 ripples/oct).

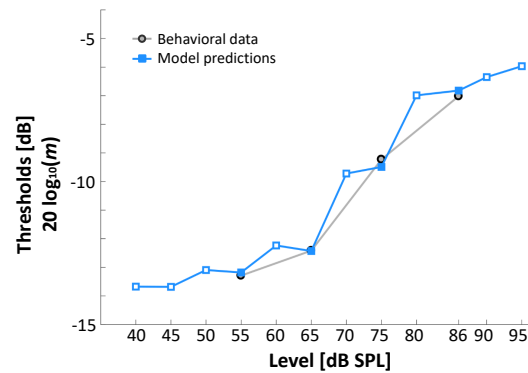

Figure 10: (Color online) Model predictions (squares) of the behavioral thresholds (circles) across different levels (ripple density of 4 ripples/oct).

#### 252 4. Discussion

253 Higher levels led to increased STMD thresholds. Moreover, increasing  
254 ripple density affected the STMD thresholds differently depending on the  
255 level. At 65 dB SPL, STMD thresholds were lowest at 2 ripples/oct. In  
256 other studies a similar trend was found. [Anderson et al. \(2012\)](#) found lowest  
257 thresholds at 3 ripples/oct, followed by increasing thresholds with increas-  
258 ing ripple density (up to 64 ripples/oct). The participants of [Eddins and](#)  
259 [Bero \(2007\)](#) performed best either at 2 or 3 ripples/oct. [Davies-Venn et al.](#)  
260 [\(2015\)](#) found a significant improvement in thresholds from 0.5 to 1 and from  
261 1 to 2 ripples/oct. Other studies ([Bernstein and Green, 1987](#); [Leek and Sum-](#)  
262 [mers, 1996](#)) have found similar trends. The most common explanation is that  
263 there are two regions in which different cues are used. For low ripple densities  
264 ( $\leq 3$  ripples/oct), the ripples are detected using a spectral-contrast mech-  
265 anism, while for higher ripple densities ( $> 3$  ripples/oct), the spectral cues  
266 become weaker and the interaction between the close peaks in the rippled

267 noise provides usable temporal cues ([Davies-Venn et al., 2015](#)). However,  
268 further studies are needed to confirm this. At 86 dB SPL, STMD thresh-  
269 olds increased with increasing ripple density, similar to what [Bernstein et al.](#)  
270 ([2013](#)) found. The effect of presentation level was largest at 4 ripples/oct,  
271 where low presentation levels (55 and 65 dB SPL) yielded significantly lower  
272 (better) STMD thresholds than high presentation levels (75 and 86 dB SPL).

273 Understanding the effect of level on STMD thresholds for NH listeners is  
274 the first step to understanding it in HI listeners. Although it is very likely  
275 that level also affects STMD thresholds of HI listeners, our results cannot be  
276 translated directly to the HI population for several reasons. Firstly, increas-  
277 ing the intensity affects neural saturation for NH and HI listeners differently.  
278 This can also affect perception differently due to the abnormal loudness-  
279 growth curve (i.e., non-linear loudness shift, [Edwards et al., 1998](#); [Hellman,](#)  
280 [1999](#)) of HI listeners. Additionally, the auditory filters of HI listeners are ab-  
281 normally broad (resulting in spectral smearing of the internal representation  
282 of the stimulus, [Moore, 2007](#)) and change less with level compared to NH  
283 listeners. Furthermore, the large heterogeneity of the HI population ([Lopez-](#)  
284 [Poveda and Johannesen, 2012](#)) would very likely play a role. Therefore, we  
285 hypothesize that STMD thresholds of HI listeners will also be affected by  
286 level and will be worse than those of NH listeners. However, testing this  
287 requires further behavioral measurements and modelling. This would be a  
288 crucial step for further understanding the differences in STMD thresholds  
289 between NH and HI participants. Our results show that attributing them to  
290 differences in spectrotemporal sensitivity would be only partially true, since  
291 level also plays an important role.

292 We used a computational model with a physiologically inspired front end  
293 to explain the behavioral results (Fig. 5). We found that the observed effects  
294 of level on the behavioral data could be explained by a worsening of the  
295 spectrotemporal representation in the AN due to broadening of the cochlear  
296 filters. Furthermore, higher levels led to more neural saturation “filling in the  
297 dips” of the neurograms. This can be seen in the increase of the neural ac-  
298 tivity (Fig. 6) and the flattening of the frequency profiles (Fig. 7). Frequency  
299 profiles at lower levels reflected the changes of the spectral information across  
300 time, while frequency profiles at higher levels lost the representation of this  
301 information (Fig. 8). All these factors diminish the coding of the spectrotem-  
302 poral pattern of the modulated stimuli in the AN with increasing level, mak-  
303 ing it harder to discriminate.

304 The regression analysis (Fig. 9) suggested that information in the au-  
305 ditory periphery is able to account for a large proportion of the variance  
306 in the behavioral data, supporting its value for predicting spectrotemporal  
307 modulation thresholds (Fig. 10).

308 Similar results could have been obtained with a more simple model (e.g., an  
309 excitation pattern model, [Moore and Glasberg, 1987](#)). However, the use of  
310 frameworks based on the biology of the auditory system has a few advan-  
311 tages. For instance, they incorporate physiological information inherently.  
312 This allows a more direct, transparent understanding of the auditory mech-  
313 anisms at different stages of the auditory pathway (the periphery in this  
314 case), since it gives insight into the representation of the stimuli at each of  
315 these steps. Additionally, the [Zilany et al. \(2009, 2014\)](#) AN model incor-  
316 porates the effects of sensorineural hearing loss due to damage to the IHCs

317 and OHCs (something that would not be straightforward to do using a non-  
318 physiological approach). Now that presented framework has been validated  
319 for the NH case, this would be of special interest, since it could allow studying  
320 the effect of level on spectrotemporal modulation detection by HI listeners  
321 using a similar framework to the one described here.

322 Furthermore, alternative back ends could have been used in the proposed  
323 model. For example, the ratio between the dispersion of the reference and  
324 the target stimulus (instead of the difference) could have been used as the  
325 predictor for the regression. Additionally, a different approach could have  
326 been used to predict the behavioral threshold. For instance, the difference  
327 in dispersion (or the quotient) between the reference and the target stimulus  
328 required for threshold could be computed. Afterwards, the modulation depth  
329 required to achieve this difference metric could be calculated iteratively, with  
330 the final value being the predicted behavioral threshold. This approach would  
331 eliminate the need for the regression model in Eq. 5.

332 The effect of presentation level has a number of implications for the use of  
333 STMD tests in experimental and clinical environments. When administering  
334 STMD tests at different levels, the observed differences in STMD thresholds  
335 should (at least partially) be attributed to the effect of level, making it  
336 more complex to interpret the contribution of spectrotemporal sensitivity  
337 only. For NH participants it is recommended to use a fixed presentation level  
338 to allow for direct comparison between their STMD thresholds. However,  
339 it is unclear how level affects STMD thresholds in HI listeners. Therefore  
340 recommendations for STMD tests in HI participants cannot be made based  
341 on our data. Future work will be focused on investigating level effects for

342 different types of spectral and spectrotemporal ripple tests, as well as for HI  
343 listeners.

## 344 **5. Conclusions**

345 STMD thresholds were higher (worse) at high than at low presentation  
346 levels, with larger differences in thresholds at 4 ripples/oct than at 2 rip-  
347 ples/oct. The computational model with a physiologically inspired front end  
348 could account for the behavioral results, showing that information at the  
349 peripheral level is sufficient to predict the behavioral thresholds. STMD  
350 thresholds obtained at different presentation levels are affected not only by  
351 differences in spectrotemporal modulation, but also at least partly by level.  
352 Therefore, this effect needs to be considered when administering STMD tests  
353 (both in clinical practice and in experimental research) and when comparing  
354 STMD thresholds within and across studies.

## 355 **Acknowledgements**

356 This work was supported by a TBM-FWO grant from the Research  
357 Foundation-Flanders [grant number T002216N] and an ERC Starting Grant  
358 (to Tom Francart) from the European Research Council under the European  
359 Union's Horizon 2020 Research and Innovation Programme [grant agreement  
360 no. 637424]. In addition, this research was jointly funded by Cochlear Ltd.  
361 and Flanders Innovation & Entrepreneurship (formerly IWT), project 50432.  
362 We would like to thank Benjamin Dieudonné for his technical help generating  
363 the stimuli. We would also like to thank the editor Dr. Brian C. J. Moore  
364 and the three anonymous reviewers for their helpful comments and feedback.

365 Finally, our most sincere thanks to our participants for their time and dedi-  
366 cated effort.

367 Anderson, E. S., Oxenham, A. J., Nelson, P. B., Nelson, D. A., 2012. Assess-  
368 ing the role of spectral and intensity cues in spectral ripple detection and  
369 discrimination in cochlear-implant users. *The Journal of the Acoustical*  
370 *Society of America* 132 (6), 3925–34.

371 Bernstein, J. G., Mehraei, G., Shamma, S., Gallun, F. J., Theodoroff, S. M.,  
372 Leek, M. R., 2013. Spectrotemporal modulation sensitivity as a predic-  
373 tor of speech intelligibility for hearing-impaired listeners. *Journal of the*  
374 *American Academy of Audiology* 24 (4), 293–306.

375 Bernstein, J. G. W., Danielsson, H., Hällgren, M., Stenfelt, S., Rönnerberg,  
376 J., Lunner, T., nov 2016. Spectrotemporal Modulation Sensitivity as a  
377 Predictor of Speech-Reception Performance in Noise With Hearing Aids.  
378 *Trends in hearing* 20, 1–17.

379 Bernstein, L. R., Green, D. M., 1987. The profile-analysis bandwidth. *The*  
380 *Journal of the Acoustical Society of America* 81 (6), 1888–1895.

381 Chi, T., Gao, Y., Guyton, M. C., Ru, P., Shamma, S., 1999. Spectro-  
382 temporal modulation transfer functions and speech intelligibility. *Journal*  
383 *of the Acoustical Society of America* 106 (5), 2719–2732.

384 Choi, J. E., Hong, S. H., Won, J. H., Park, H.-S., Cho, Y. S. Y.-S., Chung,  
385 W.-H., Cho, Y. S. Y.-S., Moon, I. J., 2016. Evaluation of Cochlear Implant  
386 Candidates using a Non-linguistic Spectrotemporal Modulation Detection  
387 Test. *Scientific reports* 6, 35235.



- 388 Choi, J. E., Won, J. H., Kim, C. H., Cho, Y. S., Hong, S. H., Moon, I. J.,  
389 2018. Relationship between spectrotemporal modulation detection and mu-  
390 sic perception in normal-hearing, hearing-impaired, and cochlear implant  
391 listeners. *Scientific Reports* 8 (1), 1–11.
- 392 Croghan, N. B. H., Smith, Z. M., 2018. Speech Understanding With Vari-  
393 ous Maskers in Cochlear-Implant and Simulated Cochlear-Implant Hear-  
394 ing: Effects of Spectral Resolution and Implications for Masking Release.  
395 *Trends in Hearing* 22 (July), 233121651878727.
- 396 Davies-Venn, E., Nelson, P., Souza, P., 2015. Comparing auditory filter band-  
397 widths, spectral ripple modulation detection, spectral ripple discrimina-  
398 tion, and speech recognition: Normal and impaired hearing. *The Journal*  
399 *of the Acoustical Society of America* 138 (1), 492–503.
- 400 Eddins, D. A., Bero, E. M., 2007. Spectral modulation detection as a function  
401 of modulation frequency, carrier bandwidth, and carrier frequency region.  
402 *The Journal of the Acoustical Society of America* 121 (1), 363–372.
- 403 Edwards, B. B. W., Struck, C. J., Dharan, P., Hou, Z., 1998. New Digital  
404 Processor for Hearing Loss Compensation based on the Auditory System.  
405 *The Hearing Journal* 51 (8), 49–52.
- 406 Elhilali, M., Chi, T., Shamma, S. A., 2003. A spectro-temporal modulation  
407 index (STMI) for assessment of speech intelligibility. *Speech Communica-*  
408 *tion* 41 (2-3), 331–348.
- 409 Francart, T., van Wieringen, A., Wouters, J., 2008. APEX 3: a multi-purpose

- 410 test platform for auditory psychophysical experiments. *Journal of Neuro-*  
411 *science Methods* 172 (2), 283–293.
- 412 Gifford, R. H., Hedley-Williams, A., Spahr, A. J., 2014. Clinical assessment of  
413 spectral modulation detection for adult cochlear implant recipients: A non-  
414 language based measure of performance outcomes. *International Journal*  
415 *of Audiology* 53 (3), 159–164.
- 416 Glasberg, B. R., Moore, B. C. J., 2000. Frequency selectivity as a function  
417 of level and frequency measured with uniformly exciting notched noise.  
418 *Journal of the Acoustical Society of America* 108 (5), 2318–2328.
- 419 Hellman, R. P., 1999. Cross-modality matching: A tool for measuring loud-  
420 ness in sensorineural impairment. *Ear and hearing* 20 (3), 193–213.
- 421 Kowalski, N., Depireux, D. A., Shamma, S. A., 1996. Analysis of dynamic  
422 spectra in ferret primary auditory cortex. I. Characteristics of single-unit  
423 responses to moving ripple spectra. *Journal of Neurophysiology* 76 (5),  
424 3503–3523.
- 425 Langner, F., Saoji, A. A., Büchner, A., Nogueira, W., 2017. Adding simul-  
426 taneous stimulating channels to reduce power consumption in cochlear  
427 implants. *Hearing Research* 345, 96–107.
- 428 Leek, M. R., Summers, V., 1996. Reduced frequency selectivity and the  
429 preservation of spectral contrast in noise. *The Journal of the Acoustical*  
430 *Society of America* 100 (3), 1796–1806.
- 431 Levitt, H., feb 1971. Transformed up-down methods in psychoacoustics. *The*  
432 *Journal of the Acoustical society of America* 49 (2), 467–477.

- 433 Liberman, M. C., 1978. Auditory-nerve response from cats raised in a low-  
434 noise chamber. *The Journal of the Acoustical Society of America* 63 (2),  
435 442–455.
- 436 Litvak, L. M., Spahr, A. J., Saoji, A. A., Fridman, G. Y., 2007. Relationship  
437 between perception of spectral ripple and speech recognition in cochlear  
438 implant and vocoder listeners. *The Journal of the Acoustical Society of*  
439 *America* 122 (2), 982–991.
- 440 Lopez-Poveda, E. A., Johannesen, P. T., 2012. Behavioral estimates of the  
441 contribution of inner and outer hair cell dysfunction to individualized au-  
442 diometric loss. *Journal of the Association for Research in Otolaryngology*  
443 13 (4), 485–504.
- 444 Mehraei, G., Gallun, F. J., Leek, M. R., Bernstein, J. G. W., 2014. Spec-  
445 trotemporal modulation sensitivity for hearing-impaired listeners: Depen-  
446 dence on carrier center frequency and the relationship to speech intelli-  
447 gibility. *The Journal of the Acoustical Society of America* 136 (1), 301–316.
- 448 Moore, B. C., Glasberg, B. R., Plack, C., Biswas, A., 1988. The shape of the  
449 ears temporal window. *The Journal of the Acoustical Society of America*  
450 83 (3), 1102–1116.
- 451 Moore, B. C. J., 2007. *Cochlear Hearing Loss: Physiological, Psychological,*  
452 *and Technical Issues*. Wiley Series in Human Communication Science.
- 453 Moore, B. C. J., Glasberg, B. R., 1987. Formulae describing frequency se-  
454 lectivity as a function of frequency and level, and their use in calculating  
455 excitation patterns. *Hearing research* 28 (2-3), 209–225.

- 456 Oxenham, A. J., Moore, B. C., 1994. Modeling the additivity of nonsimulta-  
457 neous masking. *Hearing research* 80 (1), 105–118.
- 458 R Core Team, 2017. R: A Language and Environment for Statistical Com-  
459 puting. R Foundation for Statistical Computing, Vienna, Austria.  
460 URL <https://www.r-project.org/>
- 461 Sabin, A. T., Eddins, D. a., Wright, B. a., 2012. Perceptual learning evi-  
462 dence for tuning to spectrotemporal modulation in the human auditory  
463 system. *The Journal of neuroscience : the official journal of the Society for*  
464 *Neuroscience* 32 (19), 6542–9.
- 465 Saoji, A. A., Litvak, L., Spahr, A. J., Eddins, D. A., 2009. Spectral modula-  
466 tion detection and vowel and consonant identifications in cochlear implant  
467 listeners. *Journal of the Acoustical Society of America* 126 (3), 955–958.
- 468 Supin, A. Y., Popov, V. V., Milekhina, O. N., Tarakanov, M. B., 1997.  
469 Frequency-temporal resolution of hearing measured by rippled noise. *Hear-*  
470 *ing Research* 108 (1-2), 17–27.
- 471 Won, J. H., Moon, I. J., Jin, S., Park, H., Woo, J., Cho, Y. S., Chung, W. H.,  
472 Hong, S. H., 2015. Spectrotemporal modulation detection and speech per-  
473 ception by cochlear implant users. *PLoS ONE* 10 (10), 1–24.
- 474 Zhang, T., Spahr, A. J., Dorman, M. F., Saoji, A., 2013. Relationship Be-  
475 tween Auditory Function of Nonimplanted Ears and Bimodal Benefit. *Ear*  
476 *and hearing* 34 (2), 133–41.
- 477 Zheng, Y., Escabí, M., Litovsky, R. Y., 2017. Spectro-temporal cues enhance

478 modulation sensitivity in cochlear implant users. *Hearing Research* 351,  
479 45–54.

480 Zilany, M. S. A., Bruce, I. C., 2007. Predictions of speech intelligibility with  
481 a model of the normal and impaired auditory-periphery. In: *Neural Engi-*  
482 *neering, 2007. CNE'07. 3rd International IEEE/EMBS Conference. IEEE,*  
483 *Kohala Coast, HI, USA, pp. 481–485.*

484 Zilany, M. S. A., Bruce, I. C., Carney, L. H., 2014. Updated parameters and  
485 expanded simulation options for a model of the auditory periphery. *The*  
486 *Journal of the Acoustical Society of America* 135 (1), 283–286.

487 Zilany, M. S. A., Bruce, I. C., Nelson, P. C., Carney, L. H., 2009. A phe-  
488 nomenological model of the synapse between the inner hair cell and audi-  
489 tory nerve: Long-term adaptation with power-law dynamics. *The Journal*  
490 *of the Acoustical Society of America* 126 (5), 2390–2412.
